# Supplementary material
Source: bioRxiv or medRxiv preprint supplement (https://www.biorxiv.org/highwire/filestream/43202/field_highwire_adjunct_files/0/145912-1.pdf)
Supplement: Supplementary file [file 145912-1.pdf]

# Supporting Information for: Molecular Recognition of Dopamine with Dual Near Infrared Excitation-Emission Two-Photon Microscopy

Jackson Travis Del Bonis-O'Donnell,<sup>†</sup> Ralph H. Page,<sup>†</sup> Abraham G. Beyene,<sup>†</sup> Eric G. Tindall,<sup>†</sup> Ian R. McFarlane,<sup>†</sup> Markita P. Landry<sup>†,‡</sup>

<sup>†</sup>Department of Chemical and Biomolecular Engineering, <sup>‡</sup>California Institute for Quantitative Biosciences, University of California Berkeley, Berkeley, CA 94720, USA

## Materials and Methods

### *Imaging setup and alignment*

Single photon pump light was generated using a ~5 mW CW 633 nm He-Ne laser with a 1000 nm shortpass cleanup filter and with a 1 mm beam radius at the focusing lens. 2PE pump light was generated using a single-mode-fiber-pigttailed pulsed Erbium laser (ELMO-HIGH POWER, Menlo Systems) with nominal wavelength, repetition rate, and pulsewidth of 1560 nm  $\pm$  30 nm, 100 MHz, and <90 fsec respectively. The measured beam power at the cuvette after collimation and 5X beam expansion was 77 mW with a beam waist of 4.1 mm. The pump light was focused with a 40 mm focal-length “best form” lens into the cuvette containing DTTC or SWNT, from which fluorescence emission was imaged onto a Princeton Instruments SCT 320 spectrometer slit with a pair of 50 mm focal-length plano-convex lenses of 25 mm diameter. Protected silver coated mirrors (Thorlabs) were used to direct the beam. An 860 nm long pass filter and 1500 nm short pass filter (Thorlabs) were used to exclude excitation light from the spectrometer. Accurate height alignment was needed to center the image of the fluorescence stripe on the slit region whose wavelength-dispersed image was in turn relayed to the PyLon linear detector with a 0.5 mm pixel height. Using a 150 groove/mm diffraction grating, the 1024-element detector array (with 25  $\mu$ m pixel pitch and ~25 mm length) covered a wavelength region of ~500 nm. The resultant ~20 nm / mm dispersion, coupled with typical ~1 - 2 mm slit widths, yielded spectral resolutions on the order of tens of nm.

### *DTTC and SWNT sample preparations*

Suspensions of (GT)<sub>15</sub>-DNA SWNT dopamine nanosensors were prepared by adding ~1 mg of dried raw HiPco SWNTs (NanoIntegris) to a 1 mL solution of 100  $\mu$ M ssDNA (Integrated DNA Technologies, standard desalting) in 100 mM sodium phosphate buffer (pH 7.4). The solution was then sonicated for 5-10 minutes in a bath sonicator followed by 10 minutes of probe tip sonication (3 mm tip diameter (CV18, Ultrasonic Processor, Cole Palmer). The sample was then centrifuged for 30 minutes at 16,100 x g to pellet unsuspending SWNTs, aggregates and bundles, while keeping the supernatant. The concentration of suspended SWNTs was estimated by absorbance measurements at 632 nm using an extinction coefficient of 0.036 L/(cm•mg). Fluorescence emission spectra (1PE and 2PE) were collected from a solution diluted with 1X PBS buffer to a final concentration of 10 mg/L.

Solutions of (6,5)-enriched SWNTs were prepared as described previously.<sup>34</sup> Raw HiPco SWNT were sonicated in 2% SDS for 20 hours followed by 4 hours of centrifugation at 187,000 x g, keeping the top 90% of the supernatant. Sodium cholate (SC) was then added to the solution to a final concentration between 0.1 and 0.7%. SWNTs solutions were then passed through columns containing Sephacryl 200 gel. Columns were then rinsed with 175 mM SDS and collected into fractions, which were then characterized by absorption spectroscopy. The final concentration of (6,5)-enriched SWNTs was measured to be  $3.6 \times 10^{-7}$  M (see S.I. for details).

The spectral contribution from nanotubes of different chirality was deconvolved using a custom written script in MATLAB as described previously.<sup>22</sup> Chiralities with significantly overlapping emission spectra were grouped together by integrating their intensity contributions as calculated by non-linear least squares optimization of FWHM, peak area, and center wavelength to fit a Lorentz distribution. Output of optimized parameters and resulting chirality distributions for our samples are included in the Supplementary Information Tables S1-S2, S5-S6.

#### *Dopamine nanosensor NIRF response assay*

To measure the fluorescent response of SWNT nanosensors to dopamine, the NIR emission spectra were collected from a sample cuvette containing 10 mg/L (GT)<sub>15</sub>DNA SWNT dopamine nanosensors in 1X PBS buffer. A concentrated solution of freshly prepared dopamine-HCl (Sigma) in deionized water was added to the cuvette containing 10 mg/L (GT)<sub>15</sub>DNA SWNTs to a final concentration of 100  $\mu$ M, and allowed to incubate for 5 minutes prior to collecting NIRF emission spectra.

#### *Intralipid sample preparation*

A 0.8 mm inner diameter capillary tube (PYREX, 0.8-1.1x100 mm) was filled with a SWNT nanotube suspension using capillary forces and sealed using 1% agarose gel. The capillary was suspended in the cuvette containing a solution of 1% Intralipid (Intralipid, 20% emulsion, Sigma Life Sciences) in deionized water using a V-mount attached to a linear translation stage for precise positioning. The cuvette was positioned 0.5 mm from the cuvette edge facing the pump source and 2 mm from the cuvette edge facing the spectrometer as shown in Figures 5a and 5b in the main text. The position of the objective lens was adjusted to place the beam focus at the same depth as the capillary. The entire cuvette/capillary assembly was scanned laterally across the beam focus using a translation stage in increments of 0.005 inches. The total fluorescence intensity from the sample in the capillary was collected at each position by integrating across the entire sensor array of the spectrometer.

### **Supplemental Background Information**

Two parameters of fluorophores primarily influence the engineering of a two-photon-excited imaging/sensing system: fluorescence quantum efficiency  $Q_{1P}$ , and the two-photon-absorption cross section  $\sigma_{2P}$ . For a given fluorophore concentration (number density,)  $Q_{1P}$  governs the maximum brightness available as signal photons. This in turn affects the system signal-to-noise ratio (SNR) and the time required to take a measurement or to record an image.  $\sigma_{2P}$  sets the scale for the intensity that will just barely saturate the absorption of fluorophores at the laser's focal plane. Under-pumping reduces the number of signal photons (and SNR;) over-pumping generally increases the signal strength but degrades the imaging spatial resolution. The onset of saturation can be difficult to assess, thus modeling of its impact on both transverse and longitudinal spatial resolution has been reported.<sup>1</sup>

**Estimates for  $Q_{1P}$ :** Previous reports of  $Q_{1P}$  have ranged from slightly above  $10^{-4}$ ,<sup>2</sup> to a few percent.<sup>3-7</sup> There are dramatic dependences on sample makeup and processing—aggregation, presence of “metallic” nanotubes, and host-medium properties all influence the radiationless-decay rate.

**Estimates for  $\sigma_{2P}$ :** Direct measurements of  $\sigma_{2P}$  for carbon nanotubes are scarce. Wang et al. performed two-photon excitation and adhered to a low-power regime in which the signal varied as the square of the laser fluence.<sup>8</sup> From their reported laser parameters, it can be inferred that  $\sigma_{2P}$  could not have exceeded 700,000 GM (note that 1 GM, the unit of two-photon absorption cross section, is defined as  $10^{-50}$  cm<sup>4</sup> sec/photon.) In Pomraenke et al.,<sup>9</sup> saturation of the (7,5) nanotube two-photon transition was observed as a change in slope (from 2 to 1) on a log-log plot of signal vs. laser power, as the power was increased. This puts a lower bound of 10,000 GM on  $\sigma_{2P}$ .

To obtain estimates of  $Q_{1P}$  and  $\sigma_{2P}$  for single-walled carbon nanotube (SWNTs,) nanosensors, we employed a reference dye solution (DTTC in DMSO) for which  $Q_{1P}$  and  $\sigma_{2P}$  are known,<sup>10</sup> and made relative measurements. One-photon pumping with a 633 nm He-Ne laser yielded an estimate of  $Q_{1P} = 0.0023$  (assumed to be identical for one- and two-photon pumping.) Two-photon pumping with an ultrafast 1560 nm laser enabled measurement of  $\sigma_{2P}$  to be 239,000 GM (which depends on the derived value of  $Q_{1P}$ .)

### **Theoretical assessment of fluorescence quantum efficiency $Q_{1P}$ , and the two-photon-absorption cross section $\sigma_{2P}$**

Assessment of  $Q_{1P}$  is based on measurements of the absorbed one-photon pump power  $P_{abs}$  and fluorescence signal  $S$ , which is proportional to number of detected photons. Assuming various light-collection efficiencies etc. are identical for the DTTC and SWNT samples,

$$Q_{1P,S} = Q_{1P,R} \frac{S_{1P,S} n_{1P,S}^2 / (T_{1P,S} A_{1P,S})}{S_{1P,R} n_{1P,R}^2 / (T_{1P,R} A_{1P,R})} \quad (1)$$

where  $S$  is the number of photons detected in the integration period  $T$  with the absorbed fraction  $A$  of the impinging pump light on the sample whose refractive index is  $n$ . The refractive-index factors  $n$  account for refraction of the emitted fluorescence.<sup>7</sup>

Measurement of the absorbed pump power is not realistic in the two-photon case. Instead, we assume that the two-photon-pumped volumes<sup>11</sup> are identical and rely on knowledge of the fluorophore number densities  $N$  to calculate the ratio

$$\sigma_{2P,S} = \sigma_{2P,R} \frac{S_{2P,S} n_{2P,S}^2 / (T_{2P,S} N_{2P,S} Q_{1P,S})}{S_{2P,R} n_{2P,R}^2 / (T_{2P,R} N_{2P,R} Q_{1P,R})} \quad (2)$$

Note that errors in  $Q_{1P,S}$  propagate into the  $\sigma_{2P}$  estimate. Also, pumping below the onset of saturation is assumed.

### **NIR-EE fluorescence spectroscopy setup**

The perpendicular-geometry fluorescence excitation/detection setup (Figure 1b, main text) includes a spectrophotometer cuvette mounted on a pair of translation stages that enable accurate placement with respect to the pump-beam waist. The pump light was focused with a 40 mm focal-length “best form” lens, and the beam skimmed the wall of the cuvette facing the spectrometer. The cuvette’s face was imaged with near-unity magnification onto a Princeton Instruments SCT 320 spectrometer slit with a pair of 50 mm focal-length plano-convex lenses of 25 mm diameter. Accurate height alignment centers the image of the fluorescence stripe on the spectrometer slit, whose wavelength-dispersed image is in turn relayed to the PyLon-IR linear detector array with 0.5 mm pixel height. With a 150 groove/mm diffraction grating, the 1024-element detector array (with 25  $\mu\text{m}$  pixel pitch and  $\sim 25$  mm length) covers a  $\sim 500$  nm wavelength region. The resultant  $\sim 20$  nm / mm dispersion, coupled with typical  $\sim 1 - 2$  mm slit widths, yields spectral resolutions on the order of tens of nm.

One-photon excitation of both DTTC and SWNT samples was accomplished with a  $\sim 5$  mW CW 633 nm He-Ne laser whose beam radius at the focusing lens was on the order of 1 mm. To perform two-photon excitation, a Menlo Systems single-mode-fiber-pigtailed ELMO laser was used as the excitation source. Its nominal wavelength, repetition rate, and pulsewidth were respectively 1560 nm  $\pm$  30 nm, 100 MHz, and  $<90$  fsec. Upon collimation and passage through a 5-power beam expander, the available average power was 77 mW. Aperture-transmission measurements<sup>12</sup> indicated a  $1/e^2$  beam waist parameter of 4.1 mm. If focused in free space with a 40 mm lens, the focused waist radius and confocal distance is on the order of 5  $\mu\text{m}$  and 100  $\mu\text{m}$ , respectively.

### **SWNT and DTTC sample preparation**

The SWNT samples – (GT)<sub>15</sub>-SWNT and (6,5)-enriched-SWNT were prepared as detailed previously (See Materials and Methods section of main text). The near-IR dye DTTC dissolved in DMSO has been previously calibrated in terms of quantum yield and 1.55  $\mu\text{m}$  two-photon-absorption cross section.<sup>10</sup> Our DTTC reference solutions were prepared at a concentration of 50  $\mu\text{M}$  for two-photon excitation fluorescence measurements, and approximately 5  $\mu\text{M}$  for one-photon-excitation quantum yield measurements.

SWNT sample concentrations were determined using UV-Vis-IR absorption spectrometry. Absorption spectra of the SWNT and DTTC solution in cuvettes were recorded on a Shimadzu model 3600 Plus UV-VIS-NIR spectrophotometer. Separate recordings of solvent (respectively 2% SDS in deionized water, and DMSO) spectra enabled baseline subtraction. Our measurements yielded SWNT sample concentrations of 0.76 mg/L for all (6,5) SDS SWNT suspension experiments (see Table S4). (GT)<sub>15</sub> SWNT concentrations were calculated using measured absorbance at 632 nm and extinction coefficient of  $\epsilon=0.036$  L/mg\*cm.<sup>13</sup>

### **Calibrations and quantum yield measurements**

To evaluate  $S$ , the signal proportional to the number of detected photons, it is necessary to correct for the wavelength-dependent spectrometer response  $R(\lambda)$ . A blackbody-source was used for spectrometer calibration, with the photon flux rate assumed to vary as<sup>14</sup>

$$F_{BB}(\lambda) = F_0(\lambda^{-4}e^{(hc/\lambda kT)} - 1)^{-1} \quad (3)$$

where  $F_0$  is a constant,  $\lambda$  is wavelength,  $h$  is Planck's constant,  $k$  is Boltzmann's constant,  $c$  is the speed of light and  $T$  is the temperature of the source.

A 100 watt GE soft-white light bulb was positioned approximately 10 cm from the spectrometer slit, with slit width set to 100 microns. The light bulb's filament temperature was 2550° C (2823 K).<sup>15</sup> Using the 150 groove/mm grating, spectra were recorded for center wavelengths of 1000 and 1100 nm to match the settings employed while recording DTTC and SWNT spectra. In this spectral region, the light bulb's glass envelope is not expected to influence the spectrum significantly. Impact on  $Q_{1P}$  and  $\sigma_{2P}$  is expected to be at the few-percent level because the light bulb's emission is stronger in the infrared than in the visible, and because the InGaAs detector array is comparatively insensitive in the visible region. Because the blackbody curve is gently sloped in the region of interest, an error in filament temperature also has a mild effect on the results.

Figure S3a shows an absorption spectrum of a (6,5)-enriched SWNT sample in water and 2% SDS. The well-known SWNT absorption peaks at 990 and 574 nm are clearly identifiable.<sup>16</sup> According to this data, the optical density at the 633 nm He-Ne laser wavelength is 0.142, corresponding to 26.9% single-pass absorption for a 1 cm path length. Figure S3b is the corresponding spectrum of a 5  $\mu$ M solution of DTTC in DMSO. On the short-wavelength shoulder of the 770 nm transition, the 633 nm optical density is 0.028, yielding 6.2% single-pass absorption in a 1 cm path.

Raw emission spectra  $I_{raw}(\lambda)$  for the two samples are shown in Figure S4. Despite a low concentration and low 633 nm absorption, the DTTC solution, whose emission quantum yield is 64%,<sup>10</sup> gave a strong signal, and its spectrum was recorded with a 1 sec integration time and 1 mm slit setting. For the SWNT solution, the detector integration time was set to 1 sec, and the presented spectrum represents the average of four scans. Its ~20 nm width is consistent with the 1 mm slit setting and 20 nm/mm spectrometer dispersion. Spectrometer center-wavelength settings for the two spectra are 1000 nm and 1100 nm, respectively.

White-light calibration data  $I_{bulb}(\lambda)$  for the 1000 nm and 1100 nm center spectrometer setting (150 groove/mm grating) are shown in Figure S6 and S7 respectively, which contains the raw spectrum and a 2550 °C blackbody curve. According to the InGaAs array quantum-efficiency curve, the response is nearly constant from 1000 to 1600 nm, declines sharply at 1700 nm, and declines sharply in the visible region. Thus, the response in the 800 – 1200 nm region is dominated by the diffraction-grating efficiency. We calculate the system responsivity  $R(\lambda)$  curve in Figure S4b by subtracting a 600-count dark-current offset ( $I_{background}$ ) from the raw spectrum  $I_{bulb}(\lambda)$  and then take the ratio  $(I_{raw}(\lambda) - I_{background}(\lambda)) / F_{BB}(\lambda)$ . When corrected for dark-current offsets and wavelength-dependent response  $R(\lambda)$ , the raw spectra  $I_{raw}(\lambda)$  of Figure S4 appear as in Figure S8. These are the spectra that are integrated to determine the relative numbers of detected photons  $S$ :

$$S = \int I_{raw}(\lambda) / R(\lambda) d\lambda \quad (4)$$

Upon responsivity normalization, the DTTC spectrum grows in prominence with respect to the SWNT spectrum. The limits of integration for the DTTC and SWNT spectra were respectively 750 – 1150 nm and 850 – 1250 nm. Thus, the 1270 nm scattered He-Ne laser signal did not contribute to the fluorescence spectra. Table S3 summarizes the parameters used as input data for Equation (1) and includes the derived  $Q_{1P}$  value of 0.0023 for the (6,5)-enriched SWNT solution.

This value is within the  $Q_{1P} = 0 - 1\%$  range reported by Crochet, et al.<sup>7</sup> for a suite of ultra-centrifuged samples, and close to the reported  $Q_{1P} \sim 0.25\%$  ensemble average.

The effect of varying the assumed temperature of the blackbody calibration lamp is modest. Given our present experimental spectra, the change in  $Q_{1P}$  caused by a 100 °K change is less than 4%. Uncertainties in optical densities, DTTC quantum yield, and other factors most likely combine to cause  $Q_{1P}$  to be uncertain at the several-tens-of-percent level.

### Calculating 2PE cross sections

For the fluorescence quantum yield, emission spectra for SWNT and DTTC samples can be integrated and ratioed to compute the relative two-photon-absorption cross section. In the case of one-photon absorption, monitoring the rate of pump-photon absorption is straightforward. With two-photon absorption, it is more reliable to determine the number of fluorophores in the effective volume  $V_2$  that contributes to the fluorescence signal:<sup>11</sup>

$$V_2 = \frac{4}{3} n_0 \frac{\pi^3 \omega_0^4}{\lambda} \quad (5)$$

Because the laser-spot radius  $\omega_0$  governs the confocal distance (i.e. depth of focus)  $b = 2\pi\omega_0^2/\lambda$ ,  $V_2$  can be interpreted as (spot area)\*(depth of focus). Owing to refraction, the depth of focus is elongated by the factor  $n_0$ , the medium refractive index.

Several nuances contribute to our estimates of SWNT number density. First, SWNT samples constitute a distribution of SWNT lengths, which contributes to the number of excitons each SWNT supports. We thus employ as a benchmark the average distance over which an exciton diffuses prior to recombination (radiative or otherwise). Calibrated measurements on SWNT absorption spectra<sup>17-27</sup> show that for “long” SWNTs, each carbon atom contributes a certain amount of oscillator strength to the exciton absorption peak. Thus, we can straightforwardly determine the C-atom concentration  $C_C$  of a SWNT solution, from its absorption spectrum. With knowledge of the C-atom linear density and assumed “exciton length” of the chirality under consideration, we allocate a certain number of carbon atoms to each “effective nanotube” and derive the fluorophore concentration.

Schöppler et al.<sup>16</sup> have investigated the (6,5) chirality SWNT exciton absorption peaks and find for the 990 nm (fundamental) transition, a decadal (base 10) extinction coefficient of  $4400 \text{ cm}^{-1} / (\text{mole C atoms / liter.})$  Furthermore, the (6,5) chirality nanotube’s carbon-atom linear density is 88/nm. Therefore, for the (6,5)-enriched sample measured with a 1-cm path length:

$$C_C = \frac{OD_{990}}{4400} \text{ [M]} \quad (6)$$

Assuming an effective nanotube length  $L$  [nm] that supports a single exciton, the corresponding nanotube concentration becomes:

$$N = \frac{C_C}{88L} \text{ [M]} \quad (7)$$

Values reported for SWNT exciton diffusion lengths range from 2 to 13 nm, and depend on the medium in which the nanotubes are immersed.<sup>17-27</sup> For our calculations, we choose a lower-bound of 2 nm exciton diffusion presuming that sample inhomogeneities will modulate the electrostatic potential, and act to limit exciton diffusion.  $\sigma_{2P}$  depends proportionally on the value chosen for  $L$ . Based on the SWNT-sample absorption spectrum (Figure S2a) whose optical density at the 990 nm exciton peak is 0.30, the C atom concentration is 64  $\mu\text{M}$ . With a nanotube effective length of 2 nm as per each exciton length, the derived (6,5) nanotube concentration is  $3.6 \times 10^{-7}$  M.

Uncorrected two-photon-emission spectra obtained with the 1560 nm ELMO laser are shown in Figure S5. Corresponding spectra, corrected for wavelength-dependent response using the data of Figures S6b and S7b, are shown in Figure S9. The dominance of a single emission peak near 975 nm in the SWNT spectrum is evidence of the high enrichment of a single chirality. Integrals of these spectra in the wavelength ranges 750 - 1150 nm (DTTC) and 850 - 1250 nm (SWNT) are reported in Table S4 and used in Equation (2) to derive the SWNT two-photon-absorption cross section of 239,000 GM. According to Wang *et al.*,<sup>8</sup> the 1560 nm laser wavelength is resonant with the (6,5) two-photon transition at 1.59 eV. Two-photon-excitation spectra of me Maultzsch *et al.*<sup>22</sup> and Pomraenke *et al.*<sup>9</sup> center the (6,5) transition peak at  $\sim 1650$  nm, corresponding to an energy  $\sim 1.50$  eV. The discrepancy arises from differences in the nanotube environment: SWNT from Wang *et al.* were prepared in a dry polymer matrix of poly(maleic acid/octyl vinyl ether), whereas the other studies prepared SWNT in aqueous solutions of the surfactant SDS. We conclude that the 1560 nm wavelength probed either the peak exciton cross section, or a value roughly half the peak, corresponding to higher-energy excitation.<sup>8</sup>

### Calibration lamp temperature and SWNT length contributions

The SWNT fluorescence quantum yield  $Q_{1P}$  enters parametrically into the calculation of the two-photon absorption cross section,  $\sigma_{2P}$  above. Thus, ratios of integrated, wavelength-response-corrected spectra are involved in two instances. Therefore, the wavelength-response-calibration biases applied to both the one- and two-photon data sets will nearly cancel if the emission spectra are similar for both SWNT samples, as in our case (Figure 2, main text). Thus, ignoring wavelength-independent factors in equations (1) and (2):

$$\frac{\sigma_{2P,S}}{\sigma_{2P,R}} \sim \frac{\int I_{2P,S,raw}/R(\lambda)d\lambda}{\int I_{2P,R,raw}/R(\lambda)d\lambda} \frac{\int I_{1P,R,raw}/R(\lambda)d\lambda}{\int I_{1P,S,raw}/R(\lambda)d\lambda} \quad (8)$$

$I_{1P,raw}$  and  $I_{2P,raw}$  are respectively the raw spectra obtained with one- and two-photon pumping. Given the 2 nm choice for  $L$ , our result for  $\sigma_{2P,SWNT}$  lies within the 10,000 – 700,000 GM bounds estimated from the reports of Wang *et al.* and Pomraenke *et al.* Errors in  $R(\lambda)$  cancel if  $I_{IP,raw}$  is proportional to  $I_{2P,raw}$ . Whereas a 100 °K change of the assumed calibration-lamp temperature shifted  $Q_{1P}$  by 3 – 4%, the effect on  $\sigma_{2P}$  is less than 0.3%

In addition to the effective nanotube length, which we approximate as the exciton diffusion length, the absorption cross section used to establish the carbon-atom number density contributes uncertainty to our measurements.<sup>28-32</sup> Techniques employed by Schöppler *et al.*<sup>16</sup> report cross sections differing by a factor of 2 for the  $S_1$  transition, reporting an average of  $1.7 \times 10^{-17}$  cm<sup>2</sup> per carbon atom, yielding a molar extinction coefficient of 4400 cm<sup>-1</sup>/M. For the weaker  $S_2$  transition, the reported molar extinction coefficient is  $\sim 1500$  cm<sup>-1</sup>/M. Separating the contributions to  $\sigma^{(1)}$

arising from the exciton and continuum transitions is achieved by curve-fitting. Oudjedi et al.<sup>33</sup> have since reported for the  $S_2$  transition an absorption cross section  $\sigma^{(1)}$  of  $3.2 \times 10^{-17} \text{ cm}^2$  per carbon atom, which translates to a molar extinction coefficient  $N_A \sigma^{(1)} / 1000 \ln(10) \sim 8400 \text{ cm}^{-1}/\text{M}$ . The fivefold difference in these values suggests that the uncertainty in  $\sigma_{2P}$  values is at the order-of-magnitude level.

### **Consideration of absolute signal levels for microscopy**

The estimated C-atom concentration of our (6,5)-enriched sample of  $6.4 \times 10^{-5} \text{ M}$  corresponds to a mass density of 0.76 mg/L. Under the gentle focusing conditions used, the two-photon signal (integrated over the 900 – 1300 nm spectral range) was  $\sim 30,000$  counts per second on the detector array using high gain. In this configuration, it takes roughly 80 photoelectrons to produce a count, and over much of the spectral range, the InGaAs quantum efficiency is  $\sim 0.8$ . Thus, each count represents the impingement of  $\sim 100$  photons on the detector array. Consequently, our count rate of  $3 \times 10^4/\text{sec}$  implies a signal-photon-collection rate of  $\sim 3 \times 10^6 / \text{sec}$ .

Under our focusing conditions (40 mm focal length, and 4.1 mm input beam waist parameter, using 1.55  $\mu\text{m}$  light) the focused waist  $\omega_0$  is estimated to be 4.8  $\mu\text{m}$ . With a medium (water) refractive index  $n_0$  near 1.3, the effective volume (Equation 5) is 18,600  $\mu\text{m}^3$ . At this modest spatial resolution, the multi-kHz count rate would enable production of an image with useful signal-to-noise ratio with few-msec pixel dwell times.

The expected count rate drops rapidly as higher spatial resolution is sought. For example, reduction of  $\omega_0$  to 1.0  $\mu\text{m}$  shrinks  $V_2$  to  $\sim 35 \mu\text{m}^3$ . Concomitant reduction of the photon-collection rate to  $\sim 5600 / \text{sec}$  would be expected and correspond to a  $\sim 56/\text{sec}$  photon count rate using our detector. Pixel dwell times on the order of 1 sec might be need for imaging in this scenario.

We expect that this signal strength and consequently the pixel dwell time can be improved through configuration and hardware considerations. For example, using a high-numerical-aperture light-collection system would provide significant signal improvement compared to the relatively modest f/4.6 aperture ratio used here.



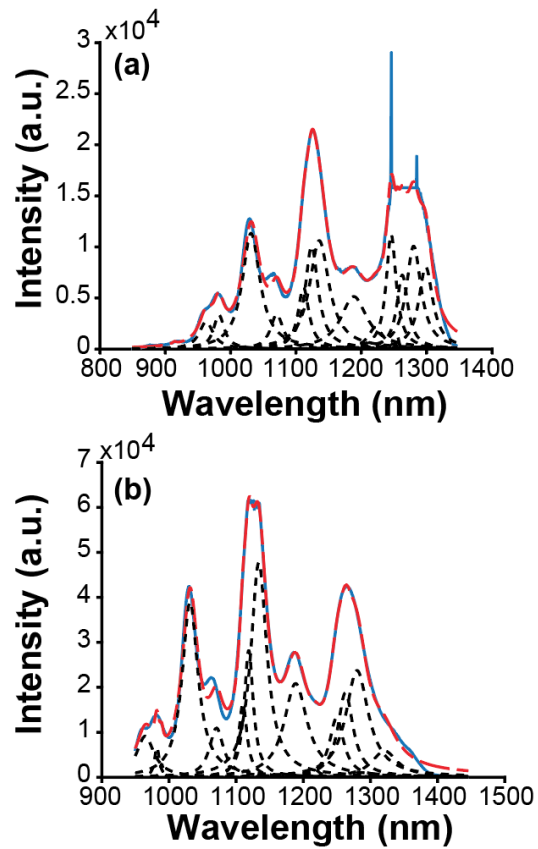

Figure S1. The deconvolution of fluorescence emission spectra for (GT)<sub>15</sub>-DNA SWNT nanosensors into individual chirality components using one-photon excitation (a) prior to dopamine addition, and (b) after dopamine addition. The solid blue line is the original spectrum and the dashed red line is the sum of the individual chirality components calculated using a non-linear least squares method.

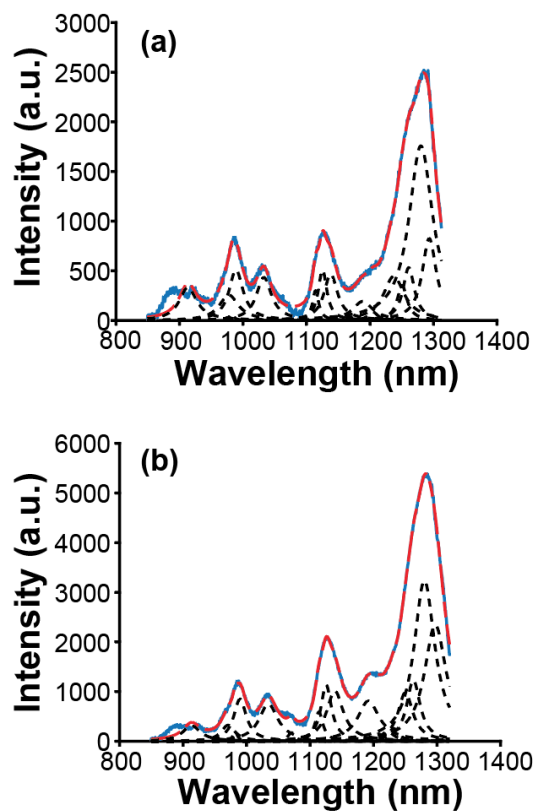

Figure S2. The deconvolution of fluorescence emission spectra using for (GT)<sub>15</sub>-DNA SWNT nanosensors into individual chirality components using two-photon excitation (a) prior to dopamine addition, and (b) after dopamine addition. The solid blue line is the original spectrum and the dashed red line is the sum of the individual chirality components calculated using a non-linear least squares method.

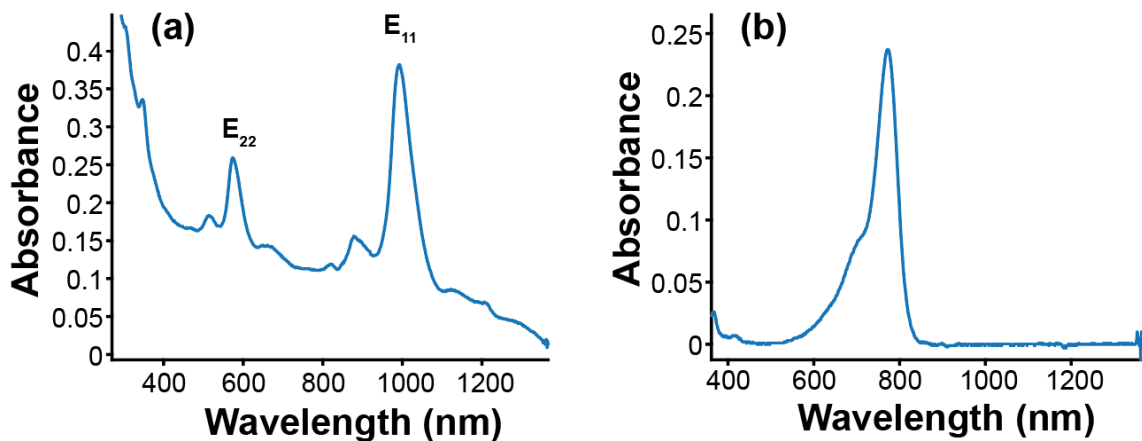

Figure S3. Absorption spectra for 10 mm path lengths of (a) a (6,5)-enriched SWNT in a 2% SDS aqueous solution (b) a <5  $\mu$ M solution of DTTC in DMSO.

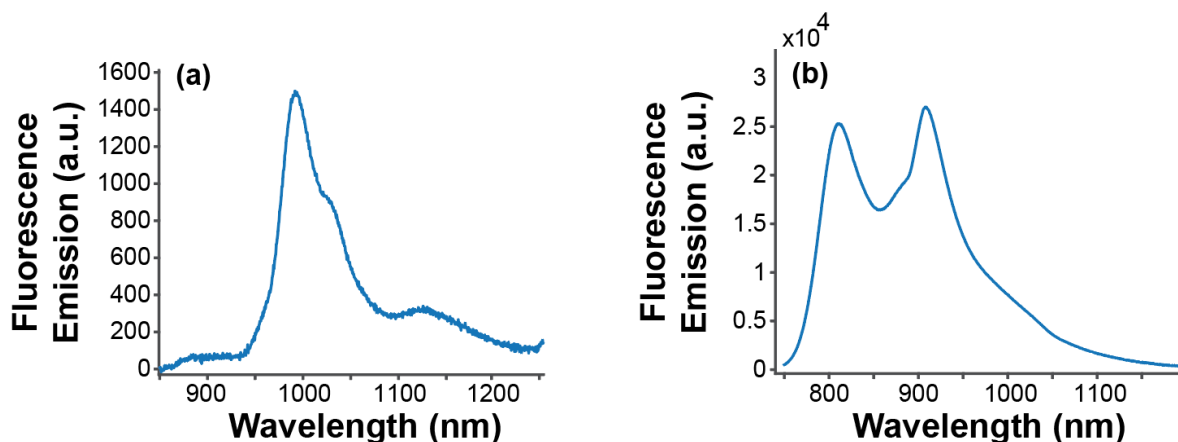

Figure S4. Raw emission spectra  $I_{raw}^{(1)}(\lambda)$  (uncorrected for wavelength-dependent spectrometer response) of (a) (6,5) – enriched SWNT sample and (b) DTTC reference solution, pumped with a 5 mW 633 nm He-Ne laser with an integration times of 1 sec.

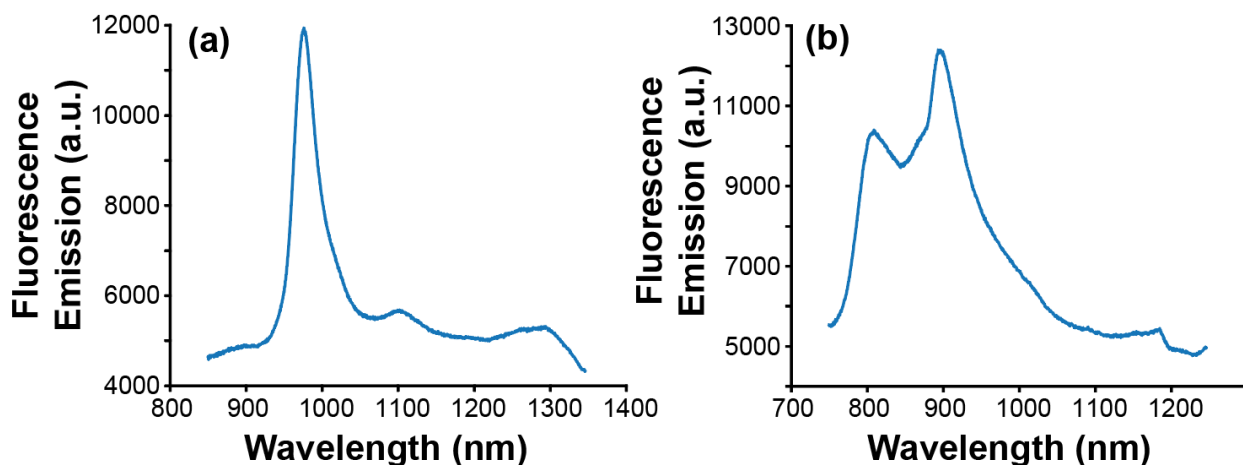

Figure S5. Raw emission spectra  $I_{raw}^{(2)}(\lambda)$  (uncorrected for baseline offset and wavelength-dependent spectrometer response) of (a) (6,5) –enriched SWNT sample and (b) DTTC reference solution, pumped with a focused 77 mW, 100 MHz rep rate, 1560 nm sub-psec laser with integrations times of 30 s and 10 s respectively.

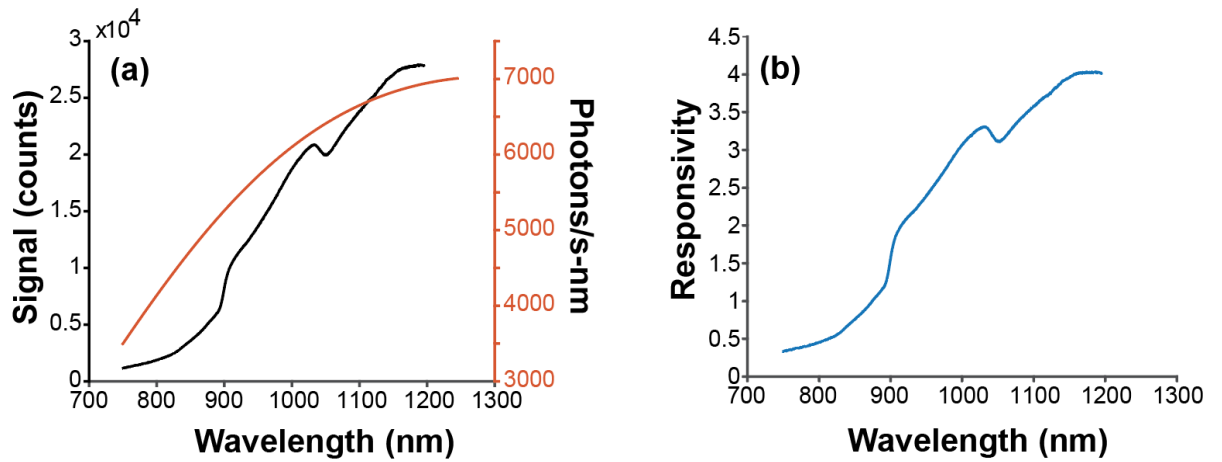

Figure S6. (a) Raw wavelength-response-calibration spectrum  $I_{bulb}(\lambda)$  obtained with 100 W soft-white light bulb and spectrometer center wavelength of 1000 nm. A scaled blackbody curve  $F_{BB}(\lambda)$  (photon/sec-nm) corresponding to 2550 °C is superimposed and set to an arbitrary scale. (b) Derived responsivity curve  $R(\lambda)$  for 1000 nm center wavelength.

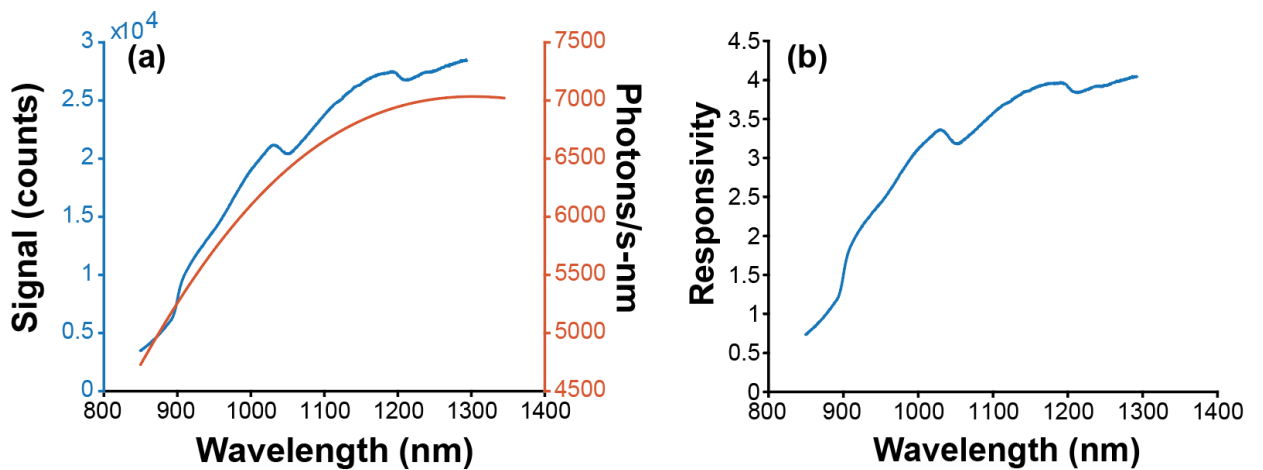

Figure S7. As in Figure S6, for 1100 nm spectrometer center wavelength.

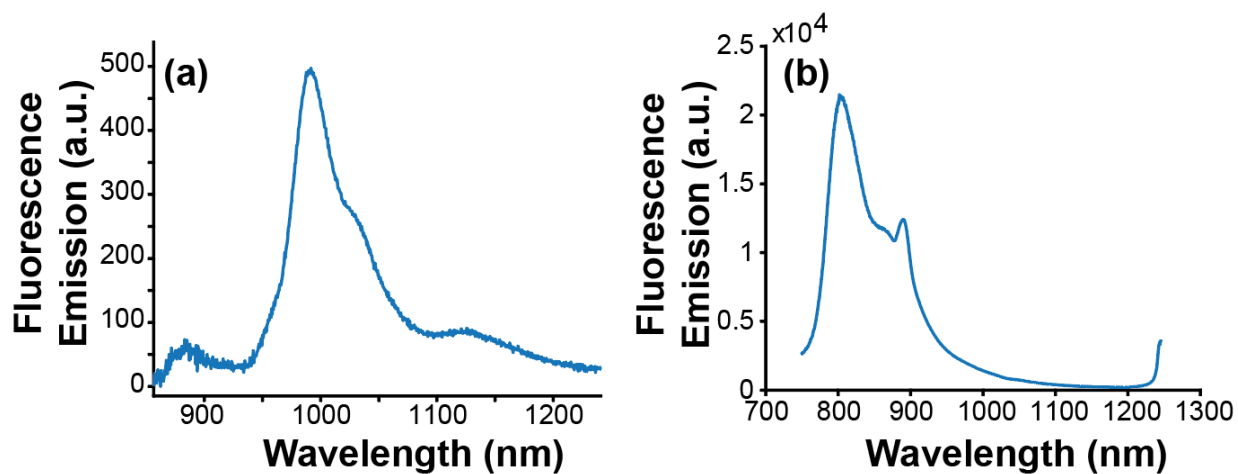

Figure S8. Wavelength-response-corrected emission spectra (of Figure S4) for (a) (6,5)-enriched SWNT sample and (b) DTTC / DMSO solution excited using the 633 nm HeNe source.

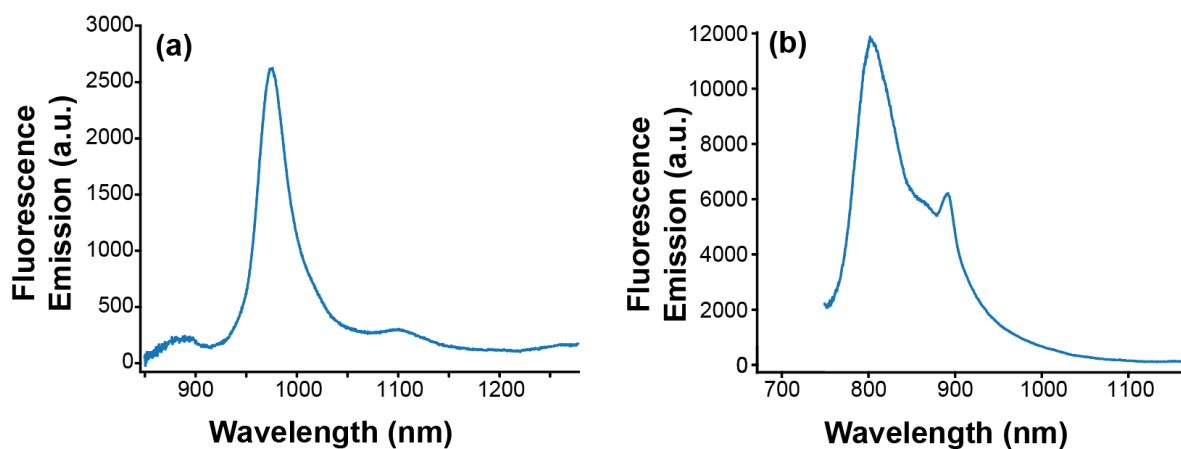

Figure S9. Wavelength-response-corrected two-photon-pumped emission spectra (of Figure S7) for (a) (6,5)-enriched SWNT sample and (b) DTTC / DMSO solution using the 1560 nm excitation source.

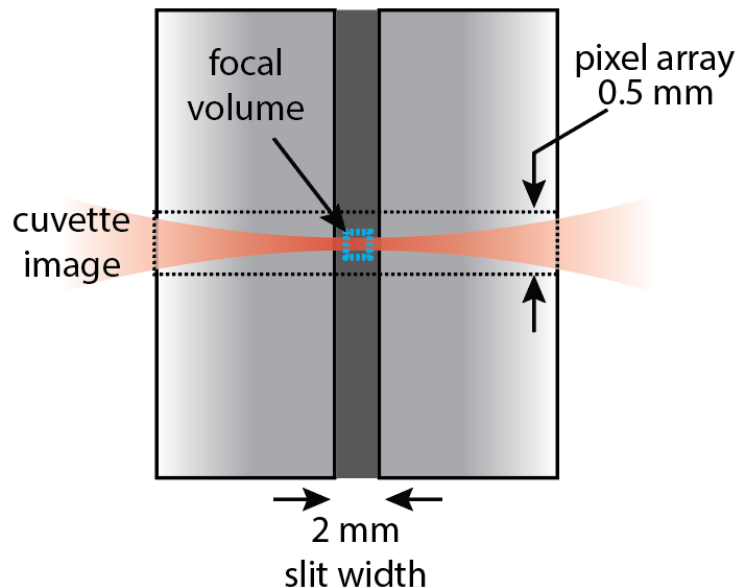

Figure S10. Imaging of scattered light and fluorescence from the sample cuvette onto the spectrometer slit whose wavelength-dispersed image is relayed to the InGaAs detector array. In the one-photon-excitation case, the stripe of fluorescent light is  $\sim 10$  mm long (corresponding to the cuvette's interior dimension,) and over-fills the slit of width  $\sim 2$  mm. With a focused Gaussian beam and two-photon excitation, the fluorescent zone length is on the order of the Rayleigh range (well under 1 mm.)

| Table S1. Deconvolution parameters calculated for Figure S1a. (GT) <sub>15</sub> -DNA wrapped SWNTs emission spectra for one-photon excitation. |   |          |             |        |            |       |             |
|-------------------------------------------------------------------------------------------------------------------------------------------------|---|----------|-------------|--------|------------|-------|-------------|
| n                                                                                                                                               | m | center   | peak height | FWHM   | area       | error | Group Sum   |
| 9                                                                                                                                               | 1 | 914.243  | 210.649     | 12.755 | 4225.316   | 0.988 | 285719.797  |
| 8                                                                                                                                               | 3 | 962.625  | 2684.545    | 34.67  | 146211.43  | 0.988 |             |
| 6                                                                                                                                               | 5 | 982.158  | 3343.418    | 25.748 | 135283.051 | 0.988 |             |
| 7                                                                                                                                               | 5 | 1031.349 | 11335.268   | 38.465 | 684893.972 | 0.988 | 684893.972  |
| 10                                                                                                                                              | 2 | 1070.674 | 3418.079    | 25.084 | 134694.695 | 0.988 | 134694.695  |
| 9                                                                                                                                               | 4 | 1111.54  | 6030.799    | 20.467 | 193918.517 | 0.988 | 1149948.776 |
| 7                                                                                                                                               | 6 | 1135.7   | 10616.916   | 34.943 | 582839.412 | 0.988 |             |
| 8                                                                                                                                               | 4 | 1123.99  | 10066.299   | 23.596 | 373190.847 | 0.988 |             |
| 8                                                                                                                                               | 6 | 1188.497 | 5143.903    | 43.098 | 348249.324 | 0.988 | 425868.32   |
| 12                                                                                                                                              | 1 | 1188.497 | 0.143       | 41.455 | 9.335      | 0.988 |             |
| 11                                                                                                                                              | 3 | 1221.925 | 2147.909    | 23.003 | 77609.661  | 0.988 | 1025445.046 |
| 8                                                                                                                                               | 7 | 1280.081 | 10072.605   | 20.908 | 330812.666 | 0.988 |             |
| 10                                                                                                                                              | 5 | 1255.575 | 1212.632    | 3.912  | 7452.37    | 0.988 |             |
| 9                                                                                                                                               | 5 | 1245.69  | 11215.355   | 14.774 | 260384.414 | 0.988 |             |
| 10                                                                                                                                              | 3 | 1262.731 | 7243.955    | 16.042 | 182547.884 | 0.988 |             |

|    |   |          |          |        |            |       |  |
|----|---|----------|----------|--------|------------|-------|--|
| 12 | 2 | 1298.621 | 8030.694 | 19.361 | 244247.712 | 0.988 |  |
| 0  | 0 | 982      | 0        | 11     | 0.008      | 0.988 |  |

Table S2. Deconvolution parameters calculated for Figure S2a. (GT)<sub>15</sub>-DNA wrapped SWNTs emission spectra for two-photon excitation.

| n  | m | center   | peak height | FWHM   | area      | error | Group Sum  |
|----|---|----------|-------------|--------|-----------|-------|------------|
| 9  | 1 | 913.224  | 331.88      | 50     | 26066.919 | 0.994 | 72355.584  |
| 8  | 3 | 977.649  | 257.106     | 47.533 | 19198.843 | 0.994 |            |
| 6  | 5 | 988.97   | 510.037     | 33.802 | 27089.822 | 0.994 |            |
| 7  | 5 | 1032.817 | 433.383     | 33.622 | 22888.569 | 0.994 | 22888.569  |
| 10 | 2 | 1070.674 | 0           | 47.587 | 0         | 0.994 |            |
| 9  | 4 | 1114.352 | 299.785     | 11.839 | 5582.977  | 0.994 | 36637.513  |
| 7  | 6 | 1138.23  | 466.756     | 24.802 | 18185.918 | 0.994 |            |
| 8  | 4 | 1125.305 | 509.057     | 16.093 | 12868.618 | 0.994 |            |
| 8  | 6 | 1204.705 | 85.268      | 15.41  | 2064.378  | 0.994 | 12903.197  |
| 12 | 1 | 1188.497 | 191.937     | 33.699 | 10160.713 | 0.994 |            |
| 11 | 3 | 1221.925 | 16.549      | 26.086 | 678.106   | 0.994 |            |
| 8  | 7 | 1280.081 | 1758.027    | 34.522 | 95333.114 | 0.994 | 166613.319 |
| 10 | 5 | 1237.523 | 444.808     | 32.434 | 22663.978 | 0.994 |            |
| 9  | 5 | 1250.598 | 352.062     | 15.088 | 8347.235  | 0.994 |            |
| 10 | 3 | 1261.027 | 532.305     | 17.032 | 14243.932 | 0.994 |            |
| 12 | 2 | 1293.366 | 825.259     | 20.075 | 26025.06  | 0.994 |            |
| 0  | 0 | 982      | 69.637      | 11     | 1204.313  | 0.994 |            |

Table S3. Parameters pertaining to determination of (6,5)-enriched SWNT quantum yield.

| Sample                 |                | DTTC / DMSO    | SWNT / H <sub>2</sub> O / SDS |
|------------------------|----------------|----------------|-------------------------------|
| Parameter              | Symbol [units] |                |                               |
| Refractive index       | n              | 1.47           | 1.33                          |
| 633 nm optical density |                | 0.028          | 0.142                         |
| Pump absorption        | A [%]          | 6.2            | 26.9                          |
| Integrated signal S    | S [counts]     | 4,765,051      | 95,229                        |
| Integration time T     | T [sec]        | 1              | 1                             |
| Quantum yield          | $Q_{1P}$       | 0.64 [Berezin] | 0.0023 [this work]            |

Table S4. Parameters pertaining to determination of (6,5)-enriched SWNT two-photon-absorption cross section.

| Sample                 |                    | DTTC / DMSO | SWNT / H <sub>2</sub> O / SDS |
|------------------------|--------------------|-------------|-------------------------------|
| Parameter              | Symbol [units]     |             |                               |
| Refractive index       | n                  | 1.47        | 1.33                          |
| 990 nm optical density |                    | N/A         | 0.28                          |
| C-atom concentration   | C <sub>C</sub> [M] | N/A         | 6.4 x 10 <sup>-5</sup>        |

|                           |                    |                     |                      |
|---------------------------|--------------------|---------------------|----------------------|
| Nanotube effective length | L [nm]             | N/A                 | 2                    |
| Fluorophore concentration | N [M]              | $50 \times 10^{-6}$ | $3.6 \times 10^{-7}$ |
| Integrated signal S       | S [counts]         | 2,554,399           | 363,725              |
| Integration time T        | T [sec]            | 10                  | 30                   |
| Quantum yield             | $Q_{1P}$           | 0.64 [Berezin]      | 0.0023 [this work]   |
| 2-photon cross section    | $\sigma_{2P}$ [GM] | 160 [Berezin]       | 239,000 [this work]  |

Table S5. Deconvolution parameters calculated for Figure S1b. (GT)<sub>15</sub>-DNA wrapped SWNTs emission spectra for one-photon excitation after adding dopamine.

| n  | m | center   | peak height | FWHM   | area        | error | Group Sum   |
|----|---|----------|-------------|--------|-------------|-------|-------------|
| 9  | 1 | 0        | 0           | 0      | 0           | 0     | 636416.135  |
| 8  | 3 | 964.615  | 9135.672    | 42.016 | 602951.289  | 0.994 |             |
| 6  | 5 | 989.067  | 2900.892    | 7.32   | 33464.846   | 0.994 |             |
| 7  | 5 | 1031.349 | 38955.573   | 33.206 | 2032290.811 | 0.994 | 2032290.811 |
| 10 | 2 | 1070.674 | 10953.679   | 27.802 | 478414.683  | 0.994 | 478414.683  |
| 9  | 4 | 1109.973 | 16241.872   | 15.121 | 385781.636  | 0.994 | 3187932.347 |
| 7  | 6 | 1133.739 | 47711.998   | 27.825 | 2085522.247 | 0.994 |             |
| 8  | 4 | 1118.765 | 28219.097   | 16.167 | 716628.464  | 0.994 |             |
| 8  | 6 | 1188.497 | 20842.375   | 36.585 | 1197806.388 | 0.994 | 1233446.233 |
| 12 | 1 | 1188.498 | 1.695       | 36.472 | 97.129      | 0.994 |             |
| 11 | 3 | 1217.884 | 1647.09     | 13.737 | 35542.716   | 0.994 |             |
| 8  | 7 | 1280.081 | 23731.299   | 30.952 | 1153877.326 | 0.994 | 2514805.571 |
| 10 | 5 | 1262.731 | 18780.126   | 21.502 | 634398.733  | 0.994 |             |
| 9  | 5 | 1249.588 | 13224.926   | 20.421 | 424330.962  | 0.994 |             |
| 10 | 3 | 1261.974 | 0.019       | 23.31  | 0.681       | 0.994 |             |
| 12 | 2 | 1320.925 | 5881.001    | 32.711 | 302197.869  | 0.994 |             |
| 0  | 0 | 982      | 6670.28     | 11     | 115416.05   | 0.994 |             |

Table S6. Deconvolution parameters calculated for Figure S2b. (GT)<sub>15</sub>-DNA wrapped SWNTs emission spectra for two-photon excitation after adding dopamine.

| n  | m | center   | peak height | FWHM   | area      | error | Group Sum |
|----|---|----------|-------------|--------|-----------|-------|-----------|
| 9  | 1 | 913.224  | 315.855     | 50     | 24808.266 | 0.998 | 83578.623 |
| 8  | 3 | 970.804  | 323.337     | 34.974 | 17767.659 | 0.998 |           |
| 6  | 5 | 989.682  | 850.254     | 30.7   | 41002.698 | 0.998 |           |
| 7  | 5 | 1034.378 | 749.891     | 41.907 | 49367.173 | 0.998 | 53278.88  |
| 10 | 2 | 1070.674 | 172.993     | 14.39  | 3911.707  | 0.998 |           |
| 9  | 4 | 1113.883 | 588.809     | 15.441 | 14291.964 | 0.998 | 98570.197 |
| 7  | 6 | 1139.063 | 1014.337    | 30.39  | 48431.738 | 0.998 |           |



|    |   |          |          |        |            |       |            |
|----|---|----------|----------|--------|------------|-------|------------|
| 8  | 4 | 1125.338 | 1134.487 | 20.114 | 35846.495  | 0.998 |            |
| 8  | 6 | 1207.928 | 145.886  | 17.571 | 4026.575   | 0.998 | 56351.099  |
| 12 | 1 | 1191.93  | 813.587  | 35.95  | 45944.254  | 0.998 |            |
| 11 | 3 | 1221.925 | 196.411  | 20.68  | 6380.27    | 0.998 |            |
| 8  | 7 | 1280.081 | 3236.224 | 30.077 | 152893.159 | 0.998 | 346407.462 |
| 10 | 5 | 1250.146 | 980.498  | 22.516 | 34682.338  | 0.998 |            |
| 9  | 5 | 1231.642 | 258.247  | 15.938 | 6465.647   | 0.998 |            |
| 10 | 3 | 1262.731 | 1230.323 | 20.102 | 38849.862  | 0.998 |            |
| 12 | 2 | 1297.224 | 2343.359 | 30.839 | 113516.456 | 0.998 |            |
| 0  | 0 | 982      | 194.44   | 11     | 3362.651   | 0.998 |            |

## References

1. Cianci, G.; Wu, J.; Berland, K., Saturation modified point spread functions in two-photon microscopy. *Microscopy Research and Technique* **2004**, *64* (2), 135-141.
2. Wang, F.; Dukovic, G.; Brus, L. E.; Heinz, T. F., Time-resolved fluorescence of carbon nanotubes and its implication for radiative lifetimes. *Physical Review Letters* **2004**, *92* (17), 177401.
3. Cherukuri, T. K.; Tsyboulski, D. A.; Weisman, R. B., Length- and Defect-Dependent Fluorescence Efficiencies of Individual Single-Walled Carbon Nanotubes. *ACS Nano* **2012**, *6* (1), 843-850.
4. Hertel, T.; Himmelein, S.; Ackermann, T.; Stich, D., Diffusion limited photoluminescence quantum yields in 1-D semiconductors: single-wall carbon nanotubes. *ACS Nano* **2010**, *12* (4), 7161-7168.
5. Lisa J. Carlson; Sara E. Maccagnano; Ming Zheng; John Silcox; Todd D. Krauss, Fluorescence Efficiency of Individual Carbon Nanotubes. *Nano Letters* **2007**, *12* (7), 3698-3703.
6. Lefebvre, J.; Austing, D. G.; Bond, J.; Finnie, P., Photoluminescence imaging of suspended single-walled carbon nanotubes. *Nano Letters* **2006**, *6* (8), 1603-1608.
7. Crochet, J.; Clemens, M.; Hertel, T., Quantum yield heterogeneities of aqueous single-wall carbon nanotube suspensions. *Journal of the American Chemical Society* **2007**, *129* (26), 8058-8059.
8. Wang, F.; Dukovic, G.; Brus, L. E.; Heinz, T. F., The optical resonances in carbon nanotubes arise from excitons. *Science* **2005**, *308* (5723), 838-840.
9. Pomraenke, R.; Maultzsch, J.; Reich, S.; Chang, E.; Prezzi, D.; Ruini, A.; Molinari, E.; Strano, M. S.; Thomsen, C.; Lienau, C., Two-photon photoluminescence and exciton binding energies in single-walled carbon nanotubes. *physica status solidi (b)* **2006**, *243* (10), 2428-2435.
10. Berezin, M. Y.; Zhan, C.; Lee, H.; Joo, C.; Akers, W. J.; Yazdanfar, S.; Achilefu, S., Two-Photon Optical Properties of Near-Infrared Dyes at 1.55  $\mu\text{m}$  Excitation. *The Journal of Physical Chemistry B* **2011**, *115* (39), 11530-11535.
11. Xu, C.; Webb, W. W., Multiphoton excitation of molecular fluorophores and nonlinear laser microscopy. In *Topics in Fluorescence Spectroscopy*, Springer: 2002; pp 471-540.
12. Siegman, A., *Lasers*. University Science Books: Mill Valley, CA, 1986; p 669.
13. Kruss, S.; Landry, M. P.; Vander Ende, E.; Lima, B. M. a.; Reuel, N. F.; Zhang, J.; Nelson, J.; Mu, B.; Hilmer, A.; Strano, M., Neurotransmitter detection using corona phase molecular

recognition on fluorescent single-walled carbon nanotube sensors. *Journal of the American Chemical Society* **2014**, *136* (2), 713-724.

14. Driscoll, W., *Handbook of Optics*. McGraw-Hill: New York, NY, 1978.
15. Klipstein, D. The Great Internet Light Bulb Book. <http://donklipstein.com/bulb1.html>.
16. Schoppler, F.; Mann, C.; Hain, T.; Neubauer, F.; Privitera, G.; Bonaccorso, F.; Chu, D.; Ferrari, A.; Hertel, T., Molar Extinction Coefficient of Single-Wall Carbon Nanotubes. *Journal of Physical Chemistry C* **2011**, *115* (30), 14682-14686.
17. Mann, C.; Hertel, T., 13 nm Exciton Size in (6,5) Single-Wall Carbon Nanotubes. *Journal of Physical Chemistry Letters* **2016**, *7* (12), 2276-2280.
18. Miyauchi, Y.; Hirori, H.; Matsuda, K.; Kanemitsu, Y., Radiative lifetimes and coherence lengths of one-dimensional excitons in single-walled carbon nanotubes. *Physical Review B* **2009**, *80* (8), 081410.
19. Miyauchi, Y., Photoluminescence studies on exciton photophysics in carbon nanotubes. *Journal of Materials Chemistry C* **2013**, *1* (40), 6499-6521.
20. Luer, L.; Hoseinkhani, S.; Polli, D.; Crochet, J.; Hertel, T.; Lanzani, G., Size and mobility of excitons in (6,5) carbon nanotubes. *Nature Physics* **2009**, *5* (1), 54-58.
21. Capaz, R.; Spataru, C.; Ismail-Beigi, S.; Louie, S., Diameter and chirality dependence of exciton properties in carbon nanotubes. *Physical Review B* **2006**, *74* (12).
22. Maultzsch, J.; Pomraenke, R.; Reich, S.; Chang, E.; Prezzi, D.; Ruini, A.; Molinari, E.; Strano, M. S.; Thomsen, C.; Lienau, C., Exciton binding energies in carbon nanotubes from two-photon photoluminescence. *Physical Review B* **2005**, *72* (24), 241402-241402.
23. Perebeinos, V.; Tersoff, J.; Avouris, P., Scaling of excitons in carbon nanotubes. *Physical Review Letters* **2004**, *92* (25), 257402.
24. Hofmann, M.; Noe, J.; Kneer, A.; Crochet, J.; Hoge, A., Ubiquity of Exciton Localization in Cryogenic Carbon Nanotubes. *Nano Letters* **2016**, *16* (5), 2958-2962.
25. Ma, X.; Roslyak, O.; Duque, J.; Pang, X.; Doorn, S.; Piryatinski, A.; Dunlap, D.; Htoon, H., Influences of Exciton Diffusion and Exciton-Exciton Annihilation on Photon Emission Statistics of Carbon Nanotubes. *Physical Review Letters* **2015**, *115* (1), 017401.
26. Iwamura, M.; Akizuki, N.; Miyauchi, Y.; Mouri, S.; Shaver, J.; Gao, Z.; Cognet, L.; Lounis, B.; Matsuda, K., Nonlinear Photoluminescence Spectroscopy of Carbon Nanotubes with Localized Exciton States. *ACS Nano* **2014**, *8* (11), 11254-11260.
27. Harrah, D.; Schneck, J.; Green, A.; Hersam, M.; Ziegler, L.; Swan, A., Intensity-Dependent Exciton Dynamics of (6,5) Single-Walled Carbon Nanotubes: Momentum Selection Rules, Diffusion, and Nonlinear Interactions. *ACS Nano* **2011**, *5* (12), 9898-9906.
28. Sanchez, S.; Bachilo, S.; Kadria-Vili, Y.; Lin, C.; Weisman, R., (n,m)-Specific Absorption Cross Sections of Single-Walled Carbon Nanotubes Measured by Variance Spectroscopy. *Nano Letters* **2016**, *16* (11), 6903-6909.
29. Streit, J.; Bachilo, S.; Ghosh, S.; Lin, C.; Weisman, R., Directly Measured Optical Absorption Cross Sections for Structure-Selected Single-Walled Carbon Nanotubes. *Nano Letters* **2014**, *14* (3), 1530-1536.
30. Liu, K.; Hong, X.; Choi, S.; Jin, C.; Capaz, R.; Kim, J.; Wang, W.; Bai, X.; Louie, S.; Wang, E.; Wang, F., Systematic determination of absolute absorption cross-section of individual carbon nanotubes. *Proceedings of the National Academy of Sciences of the United States of America* **2014**, *111* (21), 7564-7569.
31. Verdenhalven, E.; Malic, E., Excitonic absorption intensity of semiconducting and metallic carbon nanotubes. *Journal of Physics-Condensed Matter* **2013**, *25* (24).

32. Choi, S.; Deslippe, J.; Capaz, R.; Louie, S., An Explicit Formula for Optical Oscillator Strength of Excitons in Semiconducting Single-Walled Carbon Nanotubes: Family Behavior. *Nano Letters* **2013**, *13* (1), 54-58.
33. Oudjedi, L.; Parra-Vasquez, A.; Godin, A.; Cognet, L.; Lounis, B., Metrological Investigation of the (6,5) Carbon Nanotube Absorption Cross Section. *Journal of Physical Chemistry Letters* **2013**, *4* (9), 1460-1464.
